# Supplementary material for: Multichannel cladding relocation model for loss-of-flow accidents in LMFBRs
Source: MDPI journal article supplement (doi:10.3390/ma16030916), 1977-06-01
Supplement: s1 [file s1]

Supplemental Figures, SF

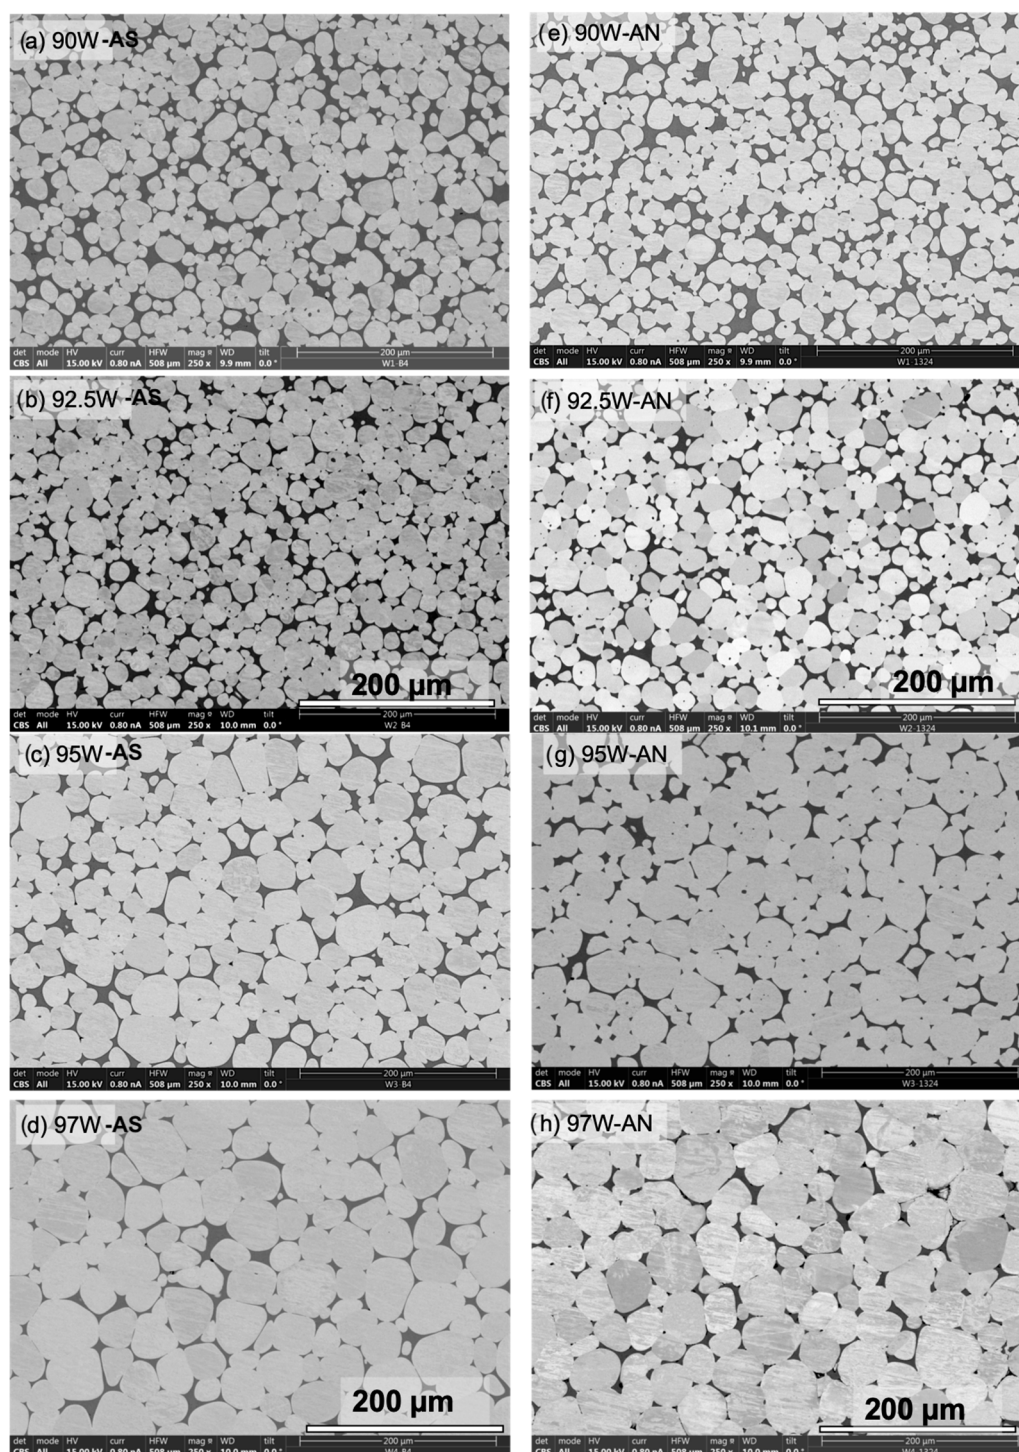

Figure S1. Low magnification SEM images of 90 to 97W WHAs before (a-d, left column: AS) and after (e-h, right column: AN) 1300 °C/24 h annealing. The scale is 200 μm for all cases.

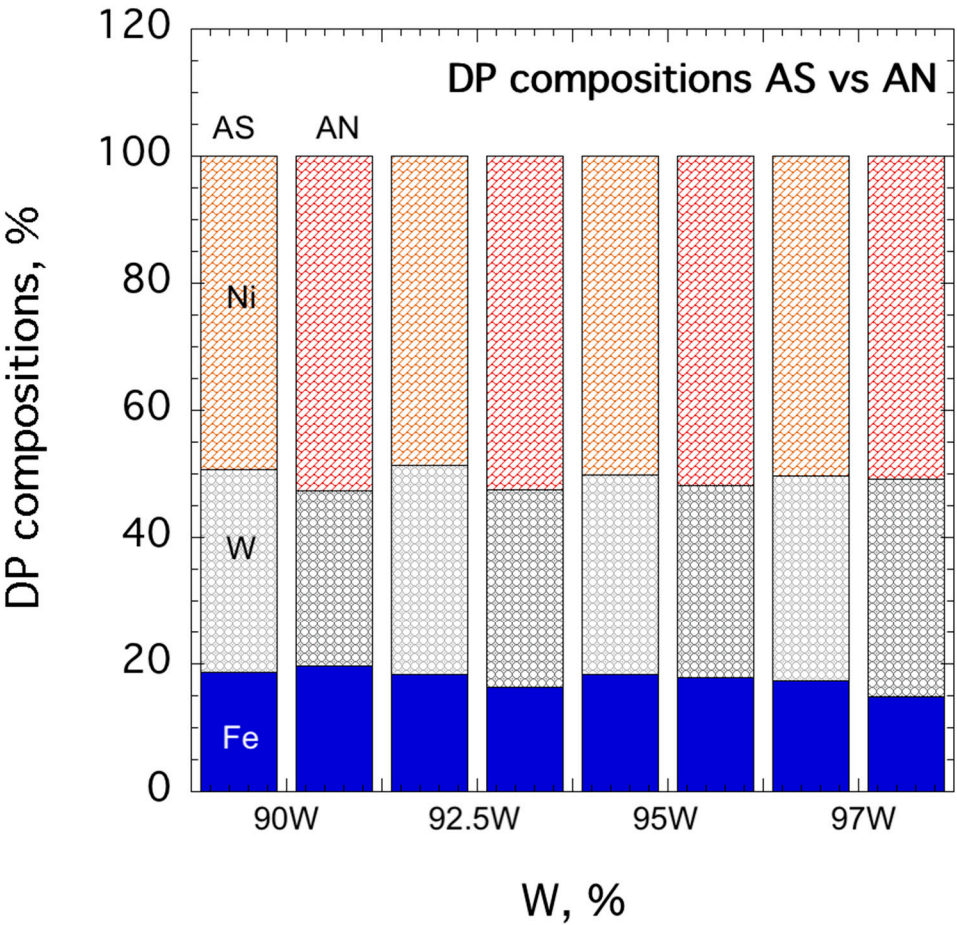

Figure S2. EDS point scan showing DP constituents (i.e., Ni, W, and Fe wt.%) as a function of WHA alloy compositions and annealing conditions.

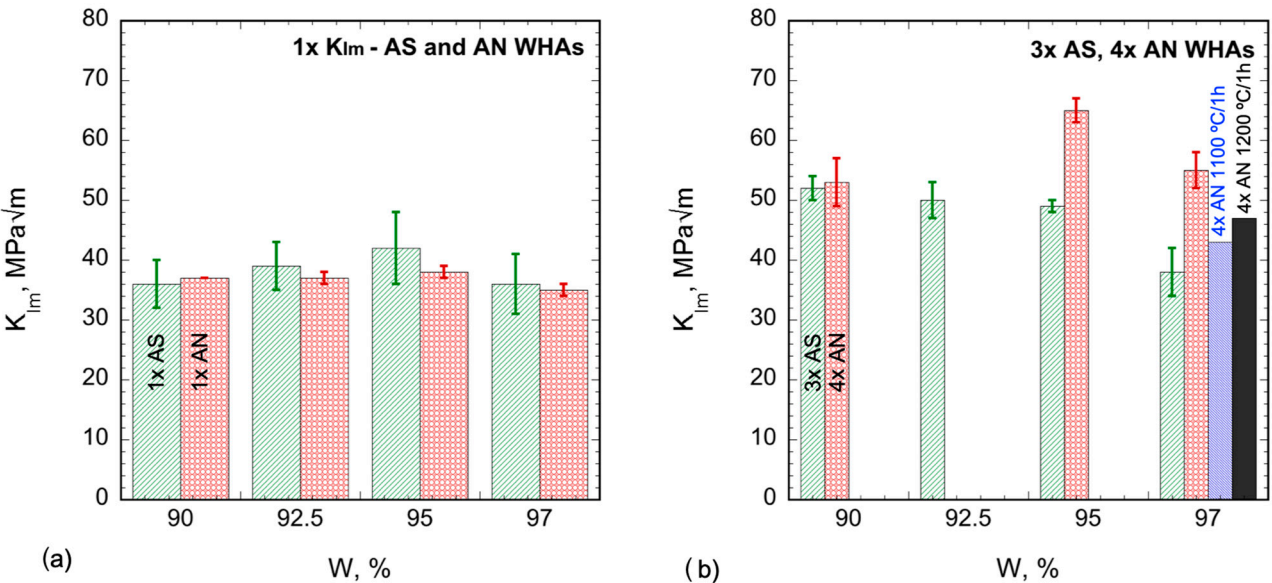

Figure S3.  $K_{Im}$  for a) 1x; an, b) 3-4x WHAs for as-sintered (AS) and annealed (AN) conditions.



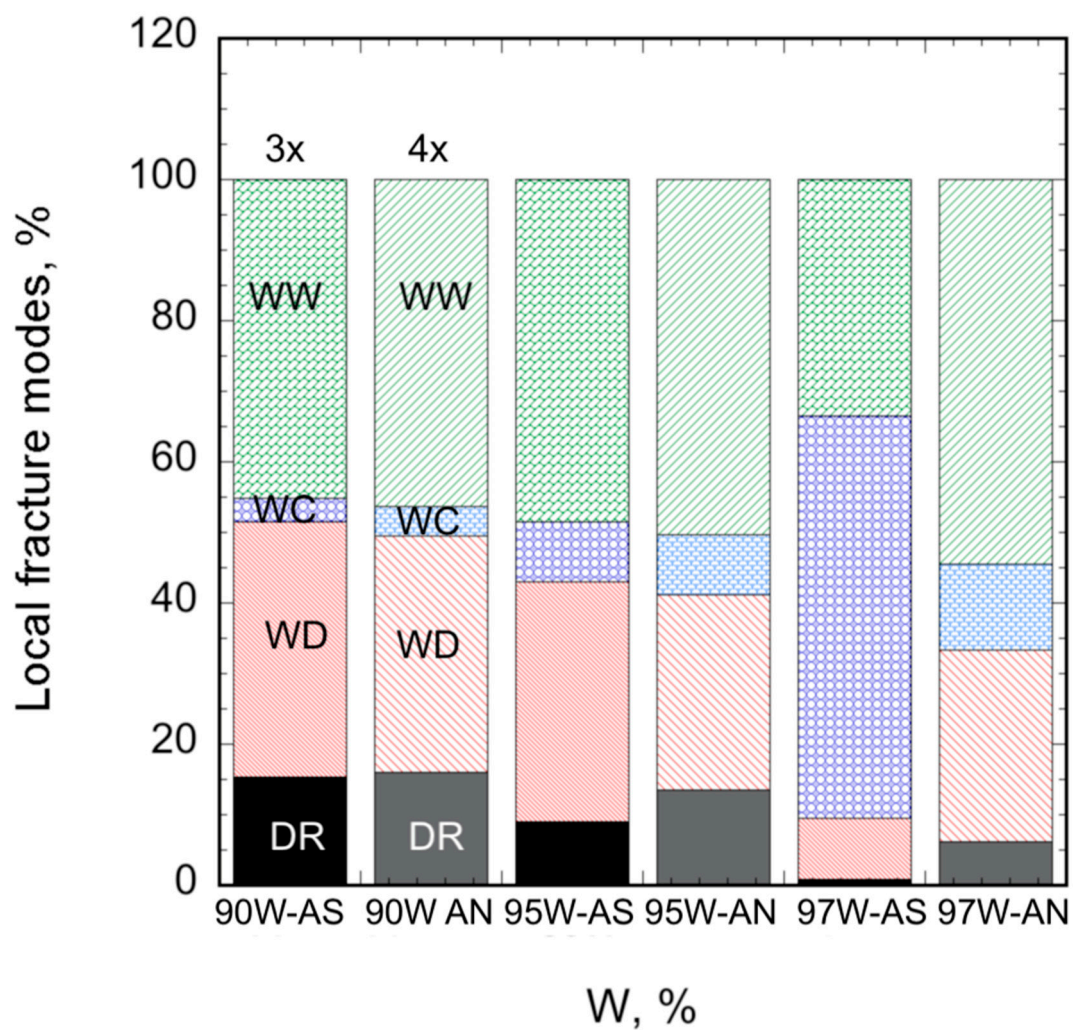

Figure S4. Local fracture modes for the as-sintered (AS) 3x and annealed (AN) 4x WHAs.

**Supplemental Tables, ST**

Supplemental Table S1: EDS point scan results for DP composition variations as a function of WHA alloy contents and annealing conditions.

| WHAs  | Condition | Ni, wt. %  | W, wt. %   | Fe, wt. %  |
|-------|-----------|------------|------------|------------|
| 90W   | AS        | 49.3 ± 0.4 | 32.0 ± 0.4 | 18.7 ± 0.2 |
|       | AN        | 52.7 ± 0.9 | 27.6 ± 1.1 | 19.7 ± 0.5 |
| 92.5W | AS        | 48.7 ± 0.7 | 32.9 ± 1.2 | 18.4 ± 0.6 |
|       | AN        | 52.4 ± 0.2 | 31.2 ± 0.3 | 16.4 ± 0.3 |
| 95W   | AS        | 50.2 ± 0.7 | 31.5 ± 0.9 | 18.3 ± 0.3 |
|       | AN        | 51.9 ± 1.2 | 30.2 ± 1.4 | 17.9 ± 0.5 |
| 97W   | AS        | 50.3 ± 0.6 | 32.3 ± 0.7 | 17.4 ± 0.3 |
|       | AN        | 50.8 ± 0.5 | 34.3 ± 1.5 | 14.9 ± 1.5 |

Supplemental Table S2: The percentage of local fracture features from the as-sintered (AS) and annealed (AN) WHA toughness fractographs.

| WHAs     | Condition | WW<br>(%) | WC<br>(%) | WD<br>(%) | DR<br>(%) |
|----------|-----------|-----------|-----------|-----------|-----------|
| 1x 90W   | AS        | 31.7      | 12.0      | 44.1      | 12.2      |
|          | AN        | 35.4      | 8.8       | 45.7      | 10.1      |
| 1x 92.5W | AS        | 37.1      | 10.9      | 40.5      | 11.5      |
|          | AN        | 47.8      | 7.7       | 37.2      | 7.3       |
| 1x 95W   | AS        | 42.6      | 13.5      | 32.8      | 11.1      |
|          | AN        | 45.2      | 13.7      | 33.5      | 7.6       |
| 1x 97W   | AS        | 67.2      | 17.6      | 10.8      | 4.4       |
|          | AN        | 56.2      | 22.5      | 16.9      | 4.4       |
| 3x 90W   | AS        | 45.1      | 3.4       | 36.2      | 15.3      |
| 4x 90W   | AN        | 46.3      | 4.1       | 33.6      | 16.0      |
| 3x 95W   | AS        | 48.4      | 8.6       | 34.0      | 9.0       |
| 4x 95W   | AN        | 50.3      | 8.6       | 27.5      | 13.6      |
| 3x 97W   | AS        | 33.4      | 57.1      | 8.7       | 0.8       |
| 4x 97W   | AN        | 54.5      | 12.1      | 27.3      | 6.1       |
